# Supplementary material for: DMSO is a strong inducer of DNA hydroxymethylation in pre-osteoblastic MC3T3-E1 cells
Source: PubMed Central journal article supplement — Epigenetics. 2012 Jun 1;7(6):635–51. doi: 10.4161/epi.20163 (PMC3398991; doi:10.4161/epi.20163), 2012-06-01

Supplementary material to:

Thaler R, Spitzer S, Karlic H, Klaushofer K, Varga F. DMSO is a strong inducer of DNA hydroxymethylation in pre-osteoblastic MC3T3-E1 cells. *Epigenetics* 2012; 7(6);

<http://dx.doi.org/10.4161/epi.20163>

<http://www.landesbioscience.com/journals/epigenetics/article/20163>





|          |       |       |       |       |       |       |             |             |                                                                               |
|----------|-------|-------|-------|-------|-------|-------|-------------|-------------|-------------------------------------------------------------------------------|
| 10428707 | 8.46  | 7.72  | -0.74 | 8.21  | 6.70  | -1.51 | NM_008216   | Has2        | hyaluronan synthase 2                                                         |
| 10435712 | 5.60  | 5.07  | -0.53 | 6.65  | 5.15  | -1.51 | BC131959    | Cd80        | CD80 antigen                                                                  |
| 10492355 | 8.85  | 8.78  | -0.07 | 10.35 | 8.85  | -1.50 | NM_008604   | Mme         | membrane metallo endopeptidase                                                |
| 10582658 | 7.26  | 7.40  | 0.13  | 9.94  | 8.44  | -1.50 | NM_007428   | Agt         | angiotensinogen (serpin peptidase inhibitor, clade A, member 8)               |
| 10481627 | 4.68  | 4.33  | -0.35 | 12.58 | 11.10 | -1.48 | NM_008491   | Lcn2        | lipocalin 2                                                                   |
| 10593460 | 4.35  | 3.85  | -0.50 | 5.73  | 4.25  | -1.47 | BC046587    | 4833427C06R | RIKEN cDNA 4833427C06 gene                                                    |
| 1045954  | 4.22  | 4.97  | 0.75  | 8.39  | 6.91  | -1.47 | NM_00103376 | EG240327    | predicted gene, EG240327                                                      |
| 10598569 | 3.23  | 3.99  | 0.77  | 4.69  | 3.23  | -1.46 | NM_00103865 | EG434729    | predicted gene, EG434729                                                      |
| 10502791 | 7.99  | 7.92  | -0.06 | 10.19 | 8.73  | -1.46 | NM_133871   | Ifi44       | interferon-induced protein 44                                                 |
| 10502855 | 7.77  | 7.40  | -0.36 | 10.93 | 9.47  | -1.46 | NM_008966   | Pgrfr       | prostaglandin F receptor                                                      |
| 10356262 | 6.54  | 6.58  | 0.04  | 8.71  | 7.27  | -1.44 | NM_00108174 | EG665378    | predicted gene, EG665378                                                      |
| 10401238 | 8.68  | 8.18  | -0.50 | 11.50 | 8.88  | -1.44 | NM_007564   | Zfp361      | zinc finger protein 36, C3H type-like 1                                       |
| 10393573 | 8.00  | 8.23  | 0.23  | 10.31 | 10.07 | -1.44 | NM_011150   | Lgals3bp    | lectin, galactoside-binding, soluble, 3 binding protein                       |
| 1047125  | 8.50  | 8.30  | -0.20 | 9.46  | 8.02  | -1.44 | NM_008344   | Igf2bp5     | insulin-like growth factor binding protein 6                                  |
| 10569020 | 4.77  | 4.52  | -0.25 | 7.49  | 6.05  | -1.43 | NM_00103363 | Irfm6       | interferon induced transmembrane protein 6                                    |
| 10429564 | 9.47  | 7.28  | -2.20 | 10.64 | 9.22  | -1.42 | NM_010738   | Ly6a        | lymphocyte antigen 6 complex, locus A                                         |
| 10362294 | 6.71  | 6.13  | -0.58 | 8.63  | 7.22  | -1.42 | NM_176837   | Ahgap18     | Rho GTPase activating protein 18                                              |
| 10566358 | 6.87  | 7.39  | 0.51  | 10.04 | 8.63  | -1.41 | NM_009099   | Trim30      | tripartite motif-containing 30                                                |
| 10389877 | 3.47  | 3.83  | 0.36  | 5.33  | 3.93  | -1.41 | ENSMUST0001 | Wfknk2      | WAP, follistatin/kazal, immunoglobulin, kunitz and netrin domain containing 2 |
| 10478048 | 4.93  | 5.18  | 0.25  | 9.43  | 8.02  | -1.41 | NM_008489   | Lbp         | lipopolysaccharide binding protein                                            |
| 10464836 | 5.27  | 5.02  | -0.25 | 6.93  | 5.53  | -1.40 | NM_013456   | Actn3       | actinin alpha 3                                                               |
| 10604661 | 6.73  | 4.64  | -2.09 | 6.29  | 4.90  | -1.39 | XM_00147822 | Gm1862      | gene model 1862, (NCBI)                                                       |
| 10395039 | 3.95  | 4.11  | 0.16  | 6.29  | 4.90  | -1.39 | NM_020557   | Cmpk2       | cytidine monophosphate (UMP-CMP) kinase 2, mitochondrial                      |
| 10569466 | 10.81 | 9.72  | -1.09 | 10.16 | 8.77  | -1.39 | NM_007631   | Cnd1        | cyclin D1                                                                     |
| 10444780 | 8.16  | 8.22  | 0.06  | 9.39  | 8.00  | -1.38 | NM_010380   | H2-D1       | histocompatibility 2, D region locus 1                                        |
| 10451287 | 5.69  | 5.36  | -0.33 | 7.86  | 6.49  | -1.37 | NM_015783   | Igfb1       | IGF1 ubiquitin-like modifier                                                  |
| 10533246 | 4.41  | 4.25  | -0.17 | 5.71  | 4.34  | -1.37 | NM_011852   | Oas1g       | 2'-5' oligoadenylate synthetase 1G                                            |
| 10411235 | 8.10  | 7.66  | -0.45 | 9.19  | 7.83  | -1.36 | NM_027711   | Igga2       | IQ motif containing GTPase activating protein 2                               |
| 10347948 | 5.50  | 5.76  | 0.26  | 7.46  | 6.10  | -1.36 | NM_013673   | Sp100       | nuclear antigen Sp100                                                         |
| 10395559 | 4.74  | 4.80  | 0.06  | 6.67  | 5.31  | -1.36 | NM_00115963 | Atp6v1c2    | ATPase, H+ transporting, lysosomal V1 subunit C2                              |
| 10347925 | 5.80  | 6.44  | 0.64  | 8.47  | 7.11  | -1.36 | NM_00108174 | EG665378    | predicted gene, EG665378                                                      |
| 10588037 | 8.33  | 7.91  | -0.42 | 10.87 | 9.52  | -1.36 | NM_011254   | Rbp1        | retinol binding protein 1, cellular                                           |
| 10399470 | 8.21  | 7.98  | -0.23 | 9.69  | 8.34  | -1.35 | NM_144551   | Trib2       | tribbles homolog 2 (Drosophila)                                               |
| 10434666 | 1.91  | 2.67  | 0.76  | 3.19  | 1.84  | -1.35 | ENSMUST0001 | ---         | ---                                                                           |
| 10361234 | 3.12  | 3.34  | 0.21  | 3.97  | 2.63  | -1.34 | NM_008298   | Hsd11b1     | hydroxysteroid 11-beta dehydrogenase 1                                        |
| 10495206 | 4.18  | 5.23  | 1.05  | 5.81  | 4.46  | -1.34 | NM_146136   | Slc16a4     | solute carrier family 16 (monocarboxylic acid transporters), member 4         |
| 10360382 | 7.06  | 6.54  | -0.52 | 7.33  | 6.00  | -1.33 | NM_008329   | Ifi204      | interferon activated gene 204                                                 |
| 10460585 | 8.07  | 6.76  | -1.32 | 7.45  | 6.12  | -1.33 | NM_010235   | Fos1        | fos-like antigen 1                                                            |
| 10592007 | 7.67  | 6.98  | -0.69 | 8.37  | 7.04  | -1.32 | NM_019391   | Lcp1        | lymphocyte specific 1                                                         |
| 10601659 | 7.76  | 7.43  | -0.34 | 6.81  | 5.36  | -1.32 | NM_026838   | Srxp2       | sushi-repeat-containing protein, X-linked 2                                   |
| 10356274 | 5.36  | 5.98  | 0.63  | 7.92  | 6.60  | -1.32 | NM_033616   | Csprs       | component of Sp100-rs                                                         |
| 1048463  | 4.22  | 4.21  | -0.01 | 6.78  | 5.46  | -1.31 | NM_009776   | Serpin1     | serine (or cysteine) peptidase inhibitor, clade G, member 1                   |
| 10531980 | 5.62  | 5.25  | -0.37 | 7.73  | 6.41  | -1.31 | NM_172777   | BC057170    | cDNA sequence BC057170                                                        |
| 10435457 | 6.77  | 6.74  | -0.03 | 8.47  | 7.16  | -1.31 | NM_030253   | Parp9       | poly (ADP-ribose) polymerase family, member 9                                 |
| 10519314 | 4.32  | 3.76  | -0.56 | 4.70  | 3.40  | -1.30 | GENSCAN0001 | ---         | ---                                                                           |
| 10453250 | 2.93  | 2.93  | 0.00  | 4.23  | 2.94  | -1.29 | ---         | ---         | ---                                                                           |
| 10510580 | 5.48  | 5.31  | -0.16 | 7.55  | 6.27  | -1.28 | NM_011612   | Tnfrsf9     | tumor necrosis factor receptor superfamily, member 9                          |
| 10533213 | 4.60  | 3.78  | -0.83 | 5.13  | 3.86  | -1.28 | NM_145226   | Oas3        | 2'-5' oligoadenylate synthetase 3                                             |
| 10450374 | 9.27  | 8.15  | -1.12 | 8.83  | 7.55  | -1.27 | L78788      | D17H6556E.5 | DNA segment, Chr 17, human D6556E.5                                           |
| 10599286 | 4.05  | 3.75  | -0.29 | 4.85  | 3.58  | -1.27 | NM_00108534 | Rhox2e      | reproductive homeobox 2E                                                      |
| 10383200 | 7.32  | 7.61  | 0.29  | 9.07  | 7.81  | -1.26 | ENSMUST0001 | ---         | ---                                                                           |
| 10436598 | 7.00  | 6.98  | -0.01 | 6.99  | 5.74  | -1.25 | ENSMUST0001 | Z810055G20R | RIKEN cDNA Z810055G20 gene                                                    |
| 10415081 | 5.15  | 4.39  | -0.75 | 4.82  | 3.58  | -1.24 | FJ556972    | EG665955    | predicted gene, EG665955                                                      |
| 10520121 | 5.15  | 4.39  | -0.75 | 4.82  | 3.58  | -1.24 | FJ556972    | EG665955    | predicted gene, EG665955                                                      |
| 10578405 | 5.15  | 4.39  | -0.75 | 4.82  | 3.58  | -1.24 | FJ556972    | EG665955    | predicted gene, EG665955                                                      |
| 10586076 | 5.15  | 4.39  | -0.75 | 4.82  | 3.58  | -1.24 | FJ556972    | EG665955    | predicted gene, EG665955                                                      |
| 10347915 | 6.12  | 6.69  | 0.57  | 8.81  | 7.57  | -1.24 | NM_00108174 | EG665378    | predicted gene, EG665378                                                      |
| 10420488 | 3.86  | 4.13  | 0.27  | 5.86  | 4.63  | -1.24 | BC145673    | D14Ert668e  | DNA segment, Chr 14, ERATO Doi 668, expressed                                 |
| 10381371 | 6.11  | 6.05  | -0.06 | 7.79  | 6.56  | -1.23 | NM_009675   | Aoc2        | amine oxidase, copper containing 3                                            |
| 10491952 | 7.83  | 8.21  | 0.38  | 8.92  | 7.69  | -1.23 | NM_174995   | Nrg2        | microsomal glutathione S-transferase 2                                        |
| 10492021 | 12.61 | 12.36 | -0.25 | 12.98 | 11.76 | -1.22 | NM_015784   | Postn       | periostin, osteoblast specific factor                                         |
| 10363735 | 7.10  | 6.34  | -0.76 | 7.50  | 6.28  | -1.22 | NM_010118   | Egr2        | early growth response 2                                                       |
| 10383206 | 7.85  | 8.12  | 0.27  | 9.60  | 8.38  | -1.21 | ENSMUST0001 | ---         | ---                                                                           |
| 10389879 | 4.54  | 4.52  | -0.02 | 6.64  | 5.43  | -1.21 | NM_181819   | Wfknk2      | WAP, follistatin/kazal, immunoglobulin, kunitz and netrin domain containing 2 |
| 10439289 | 3.06  | 2.97  | -0.09 | 3.55  | 2.35  | -1.21 | NM_00100133 | BC117090    | // cDNA sequence BC117090                                                     |
| 10582879 | 5.65  | 6.20  | 0.55  | 8.19  | 6.99  | -1.20 | NM_033616   | Csprs       | component of Sp100-rs                                                         |
| 10379228 | 4.84  | 4.46  | -0.38 | 6.25  | 5.05  | -1.20 | NM_010927   | Nos2        | nitric oxide synthase 2, inducible                                            |
| 10359571 | 5.16  | 5.21  | 0.06  | 7.21  | 6.01  | -1.20 | NM_010231   | Fmo1        | flavin containing monooxygenase 1                                             |
| 10426425 | 4.63  | 4.07  | -0.56 | 7.91  | 6.71  | -1.20 | BC151034    | Pdzrn4      | PDZ domain containing RING finger 4                                           |
| 10532709 | 8.08  | 8.13  | 0.06  | 6.99  | 5.79  | -1.20 | ---         | ---         | ---                                                                           |

| Gene           | Co basal expression | 1d 1%DMSO | 5d 1%DMSO |
|----------------|---------------------|-----------|-----------|
| <i>Aicda</i>   | 3.54                | 0.99      | 1.00      |
| <i>Apobec1</i> | 6.33                | 0.73      | 0.81      |
| <i>Apobec2</i> | 3.69                | 1.21      | 0.66      |
| <i>Apobec3</i> | 6.45                | 0.80      | 0.73      |
| <i>Apobec4</i> | 2.48                | 0.84      | 1.12      |
| <i>Smug1</i>   | 5.27                | 1.18      | 1.79      |
| <i>Tdg</i>     | 8.70                | 0.84      | 0.97      |
| <i>Ercc1</i>   | 7.84                | 0.84      | 1.10      |
| <i>Ercc2</i>   | 7.19                | 1.01      | 1.22      |
| <i>Ercc3</i>   | 8.48                | 1.16      | 1.10      |
| <i>Ercc4</i>   | 7.04                | 1.27      | 1.56      |
| <i>Ercc5</i>   | 8.32                | 1.17      | 1.03      |
| <i>Ercc6</i>   | 7.22                | 1.04      | 1.39      |
| <i>Ercc8</i>   | 5.60                | 1.24      | 1.30      |

Suppl. table 1

Fold increase in mRNA expression of genes compared to untreated control culture, which are suggested to be involved in demethylation and repair mechanisms. Genes up regulated beyond 1.1-fold or 1.5 fold are marked in bright red or dark red, respectively. Genes down regulated beyond 1.1-fold (<0.91) or 1.5 fold (<0.67) are marked in bright green or dark green, respectively. Co basal expression: the log2 signal of untreated cells at day 1.

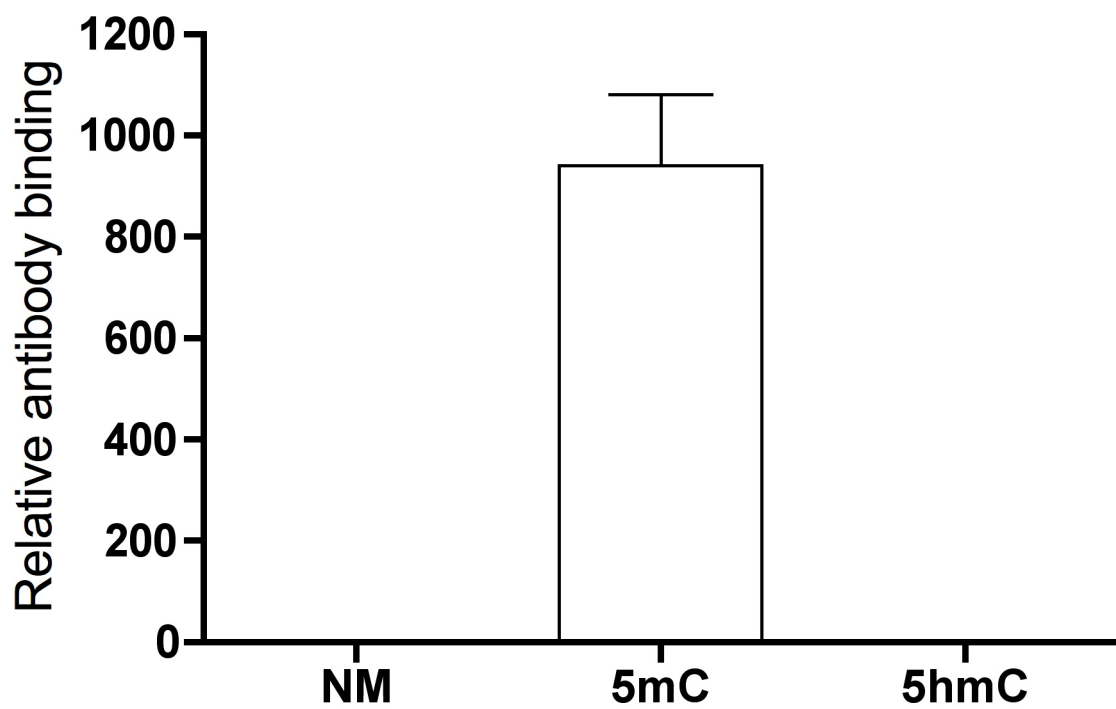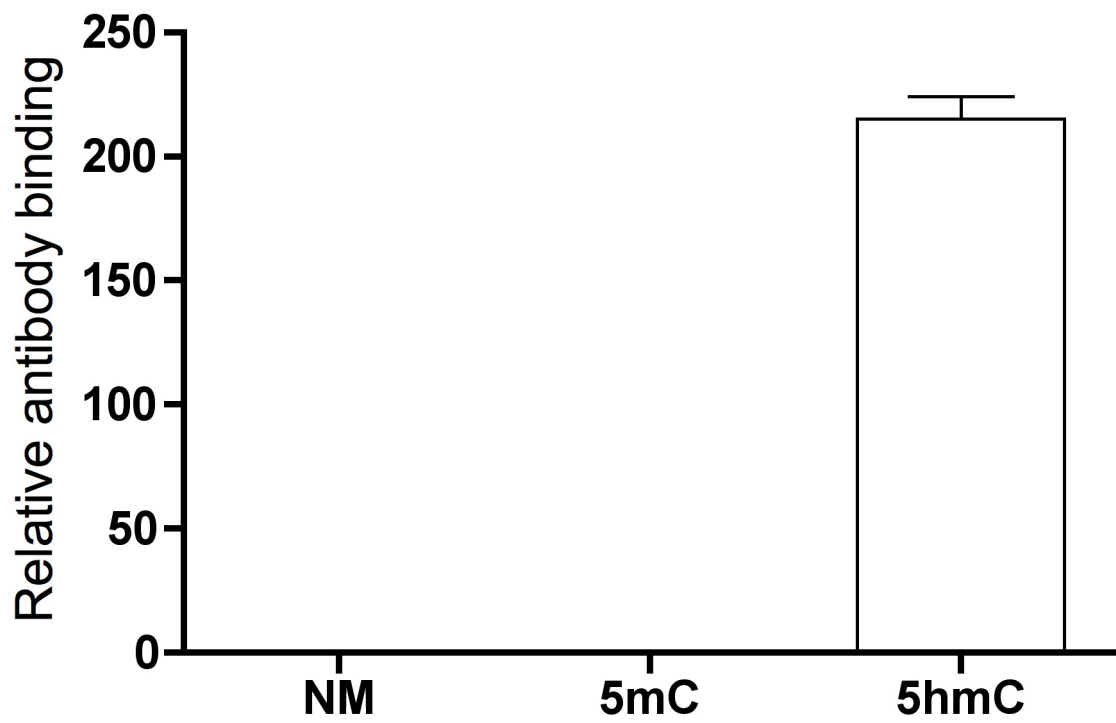

Supplement: epi-7-635-s01.pdf [file epi-7-635-s01.pdf]
